# Supplementary material for: Immunogenicity of Recombinant Zoster Vaccine: A Systematic Review, Meta-Analysis, and Meta-Regression
Source: MDPI journal article supplement (doi:10.3390/vaccines12050527), 2024-05-11
Supplement: s1 [file s1]

## Supplementary material

### Supplementary S1

#### List of studies that met the inclusion criteria and were included in the systematic review (N = 37)

1. Laing KJ, Ford ES, Johnson MJ, Levin MJ, Koelle DM, Weinberg A. Recruitment of naïve CD4+ T cells by the recombinant zoster vaccine correlates with persistent immunity. *J Clin Invest*. Published online October 3, 2023. doi:10.1172/JCI172634
2. Naficy A, Kuxhausen A, Pirrotta P, et al. No Immunological Interference or Safety Concerns When Adjuvanted Recombinant Zoster Vaccine Is Coadministered With a Coronavirus Disease 2019 mRNA-1273 Booster Vaccine in Adults Aged 50 Years and Older: A Randomized Trial. *Clin Infect Dis*. Published online June 19, 2023:ciad361. doi:10.1093/cid/ciad361
3. Weinberg A, Scott Schmid D, Leung J, Johnson MJ, Miao C, Levin MJ. Predictors of 5-Year Persistence of Antibody Responses to Zoster Vaccines. *J Infect Dis*. Published online May 4, 2023:jiad132. doi:10.1093/infdis/jiad132
4. Boutry C, Hastie A, Diez-Domingo J, et al. The Adjuvanted Recombinant Zoster Vaccine Confers Long-Term Protection Against Herpes Zoster: Interim Results of an Extension Study of the Pivotal Phase 3 Clinical Trials ZOE-50 and ZOE-70. *Clin Infect Dis*. 2022;74(8):1459-1467. doi:10.1093/cid/ciab629
5. Johnson MJ, Liu C, Ghosh D, Lang N, Levin MJ, Weinberg A. Cell-Mediated Immune Responses After Administration of the Live or the Recombinant Zoster Vaccine: 5-Year Persistence. *J Infect Dis*. 2022;225(8):1477-1481. doi:10.1093/infdis/jiab580
6. Min JY, Mwakingwe-Omari A, Riley M, et al. The adjuvanted recombinant zoster vaccine co-administered with the 13-valent pneumococcal conjugate vaccine in adults aged  $\geq 50$  years: A randomized trial. *J Infect*. 2022;84(4):490-498. doi:10.1016/j.jinf.2021.12.033
7. Muchtar E, Koehler AB, Johnson MJ, et al. Humoral and cellular immune responses to recombinant herpes zoster vaccine in patients with chronic lymphocytic leukemia and monoclonal B cell lymphocytosis. *Am J Hematol*. 2022;97(1):90-98. doi:10.1002/ajh.26388
8. Pleyer C, Laing KJ, Ali MA, et al. BTK inhibitors impair humoral and cellular responses to recombinant zoster vaccine in CLL. *Blood Adv*. 2022;6(6):1732-1740. doi:10.1182/bloodadvances.2021006574
9. Strezova A, Diez-Domingo J, Al Shawafi K, Tinoco JC, Shi M, Pirrotta P, Mwakingwe-Omari A; Zoster-049 Study Group. Long-term Protection Against Herpes Zoster by the Adjuvanted Recombinant Zoster Vaccine: Interim Efficacy, Immunogenicity, and Safety Results up to 10 Years After Initial Vaccination. *Open Forum Infect Dis*. 2022;9(10):ofac485. doi: 10.1093/ofid/ofac485.
10. Dagnew AF, Klein NP, Hervé C, et al. The Adjuvanted Recombinant Zoster Vaccine in Adults Aged  $\geq 65$  Years Previously Vaccinated With a Live-Attenuated Herpes Zoster Vaccine. *J Infect Dis*. 2021;224(7):1139-1146. doi:10.1093/infdis/jiaa083
11. Hastie A, Catteau G, Enemuo A, et al. Immunogenicity of the Adjuvanted Recombinant Zoster Vaccine: Persistence and Anamnestic Response to Additional Doses Administered 10 Years After Primary Vaccination. *J Infect Dis*. 2021;224(12):2025-2034. doi:10.1093/infdis/jiaa300
12. Hirzel C, L'Huillier AG, Ferreira VH, et al. Safety and immunogenicity of adjuvanted recombinant subunit herpes zoster vaccine in lung transplant recipients. *Am J Transplant*. 2021;21(6):2246-2253. doi:10.1111/ajt.16534
13. L'Huillier AG, Hirzel C, Ferreira VH, et al. Evaluation of Recombinant Herpes Zoster Vaccine for Primary Immunization of Varicella-seronegative Transplant Recipients. *Transplantation*. 2021;105(10):2316-2323. doi:10.1097/TP.0000000000003621
14. Schmid DS, Miao C, Leung J, Johnson M, Weinberg A, Levin MJ. Comparative Antibody Responses to the Live-Attenuated and Recombinant Herpes Zoster Vaccines. Shisler JL, ed. *J Virol*. 2021;95(12):e00240-21. doi:10.1128/JVI.00240-21
15. Stadtmauer EA, Sullivan KM, El Idrissi M, et al. Adjuvanted recombinant zoster vaccine in adult autologous stem cell transplant recipients: polyfunctional immune responses and lessons for clinical practice. *Hum Vaccines Immunother*. 2021;17(11):4144-4154. doi:10.1080/21645515.2021.1953346

- 
16. Zent CS, Brady MT, Delage C, et al. Short term results of vaccination with adjuvanted recombinant varicella zoster glycoprotein E during initial BTK inhibitor therapy for CLL or lymphoplasmacytic lymphoma. *Leukemia*. 2021;35(6):1788-1791. doi:10.1038/s41375-020-01074-4
  17. Vink P, Ramon Torrell JM, Sanchez Fructuoso A, et al. Immunogenicity and Safety of the Adjuvanted Recombinant Zoster Vaccine in Chronically Immunosuppressed Adults Following Renal Transplant: a Phase III, Randomized Clinical Trial. *Clin Infect Dis*. Published online March 7, 2019. doi:10.1093/cid/ciz177
  18. Bastidas A, De La Serna J, El Idrissi M, et al. Effect of Recombinant Zoster Vaccine on Incidence of Herpes Zoster After Autologous Stem Cell Transplantation: A Randomized Clinical Trial. *JAMA*. 2019;322(2):123. doi:10.1001/jama.2019.9053
  19. Dagnew AF, Ilhan O, Lee WS, et al. Immunogenicity and safety of the adjuvanted recombinant zoster vaccine in adults with haematological malignancies: a phase 3, randomised, clinical trial and post-hoc efficacy analysis. *Lancet Infect Dis*. 2019;19(9):988-1000. doi:10.1016/S1473-3099(19)30163-X
  20. Maréchal C, Lal H, Poder A, et al. Immunogenicity and safety of the adjuvanted recombinant zoster vaccine co-administered with the 23-valent pneumococcal polysaccharide vaccine in adults  $\geq 50$  years of age: A randomized trial. *Vaccine*. 2018;36(29):4278-4286. doi:10.1016/j.vaccine.2018.05.110
  21. Strezova A, Lal H, Enweonye I, et al. The adjuvanted recombinant zoster vaccine co-administered with a tetanus, diphtheria and pertussis vaccine in adults aged  $\geq 50$  years: A randomized trial. *Vaccine*. 2019;37(39):5877-5885. doi:10.1016/j.vaccine.2019.08.001
  22. Vink P, Delgado Mingorance I, Maximiano Alonso C, et al. Immunogenicity and safety of the adjuvanted recombinant zoster vaccine in patients with solid tumors, vaccinated before or during chemotherapy: A randomized trial. *Cancer*. 2019;125(8):1301-1312. doi:10.1002/cncr.31909
  23. Cunningham AL, Heineman TC, Lal H, et al. Immune Responses to a Recombinant Glycoprotein E Herpes Zoster Vaccine in Adults Aged 50 Years or Older. *J Infect Dis*. 2018;217(11):1750-1760. doi:10.1093/infdis/jiy095
  24. Lal H, Poder A, Campora L, et al. Immunogenicity, reactogenicity and safety of 2 doses of an adjuvanted herpes zoster subunit vaccine administered 2, 6 or 12 months apart in older adults: Results of a phase III, randomized, open-label, multicenter study. *Vaccine*. 2018;36(1):148-154. doi:10.1016/j.vaccine.2017.11.019
  25. Schwarz TF, Volpe S, Catteau G, et al. Persistence of immune response to an adjuvanted varicella-zoster virus subunit vaccine for up to year nine in older adults. *Hum Vaccines Immunother*. 2018;14(6):1370-1377. doi:10.1080/21645515.2018.1442162
  26. Weinberg A, Kroehl ME, Johnson MJ, et al. Comparative Immune Responses to Licensed Herpes Zoster Vaccines. *J Infect Dis*. 2018;218(suppl\_2):S81-S87. doi:10.1093/infdis/jiy383
  27. Godeaux O, Kovac M, Shu D, et al. Immunogenicity and safety of an adjuvanted herpes zoster subunit candidate vaccine in adults  $\geq 50$  years of age with a prior history of herpes zoster: A phase III, non-randomized, open-label clinical trial. *Hum Vaccines Immunother*. 2017;13(5):1051-1058. doi:10.1080/21645515.2016.1265715
  28. Gruppig K, Campora L, Douha M, et al. Immunogenicity and Safety of the HZ/su Adjuvanted Herpes Zoster Subunit Vaccine in Adults Previously Vaccinated With a Live Attenuated Herpes Zoster Vaccine. *J Infect Dis*. 2017;216(11):1343-1351. doi:10.1093/infdis/jix482
  29. Schwarz TF, Aggarwal N, Moeckesch B, et al. Immunogenicity and Safety of an Adjuvanted Herpes Zoster Subunit Vaccine Coadministered With Seasonal Influenza Vaccine in Adults Aged 50 Years or Older. *J Infect Dis*. 2017;216(11):1352-1361. doi:10.1093/infdis/jix481
  30. Strezova A, Godeaux O, Aggarwal N, Leroux-Roels G, Lopez-Fauqued M, Van Damme P, et al. A randomized lot-to-lot immunogenicity consistency study of the candidate zoster vaccine HZ/su. *Vaccine*. 2017;35(48 Pt B):6700-6706. doi: 10.1016/j.vaccine.2017.10.017.
  31. Vink P, Shiramoto M, Ogawa M, et al. Safety and immunogenicity of a Herpes Zoster subunit vaccine in Japanese population aged  $\geq 50$  years when administered subcutaneously vs. intramuscularly. *Hum Vaccines Immunother*. 2017;13(3):574-578. doi:10.1080/21645515.2016.1232787
  32. Chlibek R, Pauksens K, Rombo L, et al. Long-term immunogenicity and safety of an investigational herpes zoster subunit vaccine in older adults. *Vaccine*. 2016;34(6):863-868. doi:10.1016/j.vaccine.2015.09.073
  33. Berkowitz EM, Moyle G, Stellbrink HJ, et al. Safety and Immunogenicity of an Adjuvanted Herpes Zoster Subunit Candidate Vaccine in HIV-Infected Adults: A Phase 1/2a Randomized, Placebo-Controlled Study. *J Infect Dis*. 2015;211(8):1279-1287.
  34. Chlibek R, Smetana J, Pauksens K, et al. Safety and immunogenicity of three different formulations of an adjuvanted varicella-zoster virus subunit candidate vaccine in older adults: A phase II, randomized, controlled study. *Vaccine*. 2014;32(15):1745-1753. doi:10.1016/j.vaccine.2014.01.019

- 
35. Stadtmauer EA, Sullivan KM, Marty FM, et al. A phase 1/2 study of an adjuvanted varicella-zoster virus subunit vaccine in autologous hematopoietic cell transplant recipients. *Blood*. 2014;124(19):2921-2929. doi:10.1182/blood-2014-04-573048
  36. Chlibek R, Bayas JM, Collins H, et al. Safety and Immunogenicity of an AS01-adjuvanted Varicella-zoster Virus Subunit Candidate Vaccine Against Herpes Zoster in Adults  $\geq 50$  Years of Age. *J Infect Dis*. 2013;208(12):1953-1961. doi:10.1093/infdis/jit365
  37. Leroux-Roels I, Leroux-Roels G, Clement F, et al. A Phase 1/2 Clinical Trial Evaluating Safety and Immunogenicity of a Varicella Zoster Glycoprotein E Subunit Vaccine Candidate in Young and Older Adults. *J Infect Dis*. 2012;206(8):1280-1290. doi:10.1093/infdis/jis497

## Supplementary S2

### Supplementary tables

**Table S1.** Search strategy

| Database                 | Search strategy                                                                                                                                                                                                                                                                                                                                                                                                                                                                                                                                                                   | Reports retrieved |
|--------------------------|-----------------------------------------------------------------------------------------------------------------------------------------------------------------------------------------------------------------------------------------------------------------------------------------------------------------------------------------------------------------------------------------------------------------------------------------------------------------------------------------------------------------------------------------------------------------------------------|-------------------|
| MEDLINE/PubMed           | ("Herpes Zoster Vaccine"[Mesh] OR ("Herpes Zoster/prevention and control"[Mesh] AND "Vaccination"[Mesh]) OR (zoster vaccine*[TIAB]) OR (zoster immunization[TIAB]) OR (zoster immunisation[TIAB]) OR (VZV vaccin*[TIAB])) AND ("Antibodies, Viral"[Mesh:NoExp] OR "Serologic Tests"[Mesh] OR seroconversion[TIAB] OR seroconverted[TIAB] OR serological[TIAB] OR antibod*[TIAB] OR immunogenicity[TIAB] OR immunization[TIAB] OR immunisation[TIAB] OR (immune response[TIAB]) OR immunity[TIAB] OR effectiveness[TIAB] OR efficacy[TIAB]) NOT (Animals [Mesh] NOT Humans [Mesh]) | 1125              |
| Embase                   | ('varicella zoster vaccine':ti,ab,kw OR (('herpes zoster' NEXT/2 (vaccin* OR immunization OR immunisation)):ab,ti)) AND ('zoster antibody' OR 'serodiagnosis'/de OR 'drug efficacy'/de OR immunogenicity:ti,ab,de OR efficacy:ti,ab,de OR effectiveness:ti,ab,de OR effectivity:ti,ab,de OR antibod*:ti,ab OR seroconversion:ti,ab OR 'response to vaccination':ti,ab OR ((response NEAR/3 'zoster vaccination'):ti,ab))                                                                                                                                                          | 494               |
| Web of Science           | zoster vaccin* (Title) and (immunogenicity OR efficacy OR effectiveness OR antibod* OR (response to vaccination)) (All Fields)                                                                                                                                                                                                                                                                                                                                                                                                                                                    | 744               |
| WHO Global Index Medicus | herpes zoster vaccin*                                                                                                                                                                                                                                                                                                                                                                                                                                                                                                                                                             | 182               |

**Table S2.** PICOS framework

|              |                                                                                                                                                                                                                                                                                                                      |
|--------------|----------------------------------------------------------------------------------------------------------------------------------------------------------------------------------------------------------------------------------------------------------------------------------------------------------------------|
| Population   | Adults aged 18 years or older.                                                                                                                                                                                                                                                                                       |
| Intervention | Two doses of Herpes zoster adjuvanted recombinant subunit vaccine (RZV), consisting of 50µg of recombinant VZV glycoprotein E and the liposome-based AS01 <sub>B</sub> adjuvant system (containing 50µg of 3-O-desacyl- 4'-monophosphoryl lipid A and 50µg of <i>Quillaja saponaria</i> Molina, fraction 21 [QS21]). |
| Comparators  | None or, where available, age group, sex, primary or secondary immunosuppression, history of herpes zoster, previous vaccination with live-attenuated zoster vaccine (ZVL), co-administration of RZV with other vaccines (including candidate vaccines).                                                             |
| Outcomes     | Proportion of subjects who tested positive for anti-gE humoral and cell-mediated immunity (defined as vaccine response rate [VRR]), avidity index, geometric mean concentration (GMC) of antibody (related to within-study comparison).                                                                              |
| Study design | Randomized control trials (RCTs), quasi-randomised control trials (qRCTs), cohort and case control studies, and research letter with original data.                                                                                                                                                                  |

**Table S3.** Full texts not included in the systematic review, with reason for exclusion

| N  | First author and year of publication | Title                                                                                                                                                                                                                                        | Reason for exclusion                  |
|----|--------------------------------------|----------------------------------------------------------------------------------------------------------------------------------------------------------------------------------------------------------------------------------------------|---------------------------------------|
| 1  | Lal et al., 2013                     | Safety and immunogenicity of an AS01-adjuvanted varicella zoster virus subunit candidate vaccine (HZ/su)                                                                                                                                     | Data not presented in a suitable form |
| 2  | Cohen et al., 2014                   | Detection of Antibodies to Varicella-Zoster Virus in Recipients of the Varicella Vaccine by Using a Luciferase Immunoprecipitation System Assay                                                                                              | No data on immune response to RZV     |
| 3  | Diez-Domingo et al., 2016            | Efficacy and immunogenicity of an investigational subunit adjuvanted herpes zoster vaccine in older adults in Europe: Results from the ZOE-50 and ZOE-70 efficacy studies                                                                    | Conference abstract                   |
| 4  | McElhaney et al., 2016               | Efficacy, immunogenicity and safety of an investigational subunit adjuvanted herpes zoster vaccine in adults aged 60 years and older: Results from the zoe-50 and zoe-70 efficacy studies                                                    | Conference abstract                   |
| 5  | Poder et al., 2016                   | Immunogenicity and safety of 2 doses of an investigational herpes zoster subunit vaccine administered 2, 6 or 12 months apart in adults 50 years and older: Results of a phase III, randomized, open-label, multicenter trial                | Conference abstract                   |
| 6  | Bao et al., 2016                     | Immunogenicity of varicella zoster virus glycoprotein E DNA vaccine                                                                                                                                                                          | Non-human study                       |
| 7  | Verna et al., 2016                   | La vacuna de subunidades recombinantes para herpes zoster demostró ser eficaz en adultos mayores/ Adjuvanted herpes zoster subunit vaccine proved to be effective in older adults                                                            | Commentary                            |
| 8  | Weinberg et al., 2017                | A comparison of the immunogenicity of a live attenuated herpes zoster vaccine (ZV) and the recombinant gE/AS01B candidate vaccine in older adults                                                                                            | Conference abstract                   |
| 9  | Pauksens et al., 2017                | Persistence of immune response to an adjuvanted varicella-zoster virus subunit candidate vaccine for up to year 9 in older adults                                                                                                            | Conference abstract                   |
| 10 | McElhaney et al., 2018               | Efficacy, Immunogenicity and Safety of adjuvanted Herpes Zoster-Virus Subunit Vaccine Candidates in Adults from 60 Years and older: Results from the Efficacy Studies ZOE-50 and ZOE-70                                                      | Conference abstract                   |
| 11 | Mrkvan et al., 2018                  | Persistence of immune response and safety of an adjuvanted recombinant zoster vaccine in older adults previously vaccinated with a live-attenuated herpes zoster vaccine: End-of-study results of a phase III, group-matched, clinical trial | Conference abstract                   |

|    |                         |                                                                                                                                                                                                                    |                                                                                                       |
|----|-------------------------|--------------------------------------------------------------------------------------------------------------------------------------------------------------------------------------------------------------------|-------------------------------------------------------------------------------------------------------|
| 12 | Levin et al., 2018      | Th1 memory differentiates recombinant from live herpes zoster vaccines                                                                                                                                             | Data not presented in a suitable form                                                                 |
| 13 | Sullivan et al., 2019   | Immunogenicity and safety of an adjuvanted herpes zoster subunit vaccine in adult autologous hematopoietic stem cell transplant recipients: Phase 3, randomized, placebo-controlled, ZOEHSCT clinical trial        | Conference abstract                                                                                   |
| 14 | Oostvogels et al., 2019 | Medical conditions at enrollment do not impact efficacy and safety of the adjuvanted recombinant zoster vaccine: a pooled post-hoc analysis of two parallel randomized trials                                      | No data on immune response to RZV                                                                     |
| 15 | Righi et al., 2019      | Serological and T Cell Responses After Varicella Zoster Virus Vaccination in HIV-Positive Patients Undergoing Renal Dialysis                                                                                       | No data on immune response to RZV                                                                     |
| 16 | Yang et al., 2019       | Evaluation of Varicella-zoster virus-specific cell-mediated immunity by interferon- $\gamma$ Enzyme-Linked Immunosorbent Assay in adults $\geq 50$ years of age administered a herpes zoster vaccine               | No data on immune response to RZV                                                                     |
| 17 | Verolet et al., 2019    | Long-term Seroprotection of Varicella-zoster Immunization in Pediatric Liver Transplant Recipients                                                                                                                 | No data on immune response to RZV                                                                     |
| 18 | Muchtar et al., 2020    | Immunogenicity of a Recombinant Herpes Zoster Vaccine in Patients with Chronic Lymphocytic Leukemia                                                                                                                | Conference abstract                                                                                   |
| 19 | Sweiss et al., 2020     | High rates of varicella zoster virus antibody seroconversion and persistence after administration of the adjuvanted, recombinant varicella zoster vaccine in multiple myeloma patients undergoing active treatment | Conference abstract                                                                                   |
| 20 | Kallmark et al., 2020   | Immunogenicity of Adjuvanted Herpes Zoster Subunit Vaccine in Rheumatoid Arthritis Patients Treated with Janus Kinase Inhibitors and Controls: Preliminary Results                                                 | Conference abstract                                                                                   |
| 21 | Barghash et al., 2020   | Recombinant Herpes Zoster Vaccine (RZV) after Heart Transplantation: A Single Center Experience                                                                                                                    | No data on immune response to RZV                                                                     |
| 22 | Camargo et al., 2020    | Immunogenicity and Safety of the Adjuvanted Recombinant Zoster Vaccine in Adult Hematopoietic Cell Transplant Recipients: A Single Center Study                                                                    | Conference abstract                                                                                   |
| 23 | Camargo et al., 2020    | Reduced immunogenicity of the adjuvanted recombinant zoster vaccine after hematopoietic cell transplant: a pilot study                                                                                             | No data on anti-gE response                                                                           |
| 24 | Curran et al., 2021     | Recombinant Zoster Vaccine Is Efficacious and Safe in Frail Individuals                                                                                                                                            | Same data as in other studies (Cunningham et al., 2018)                                               |
| 25 | Pleyer et al., 2021     | Effect of Bruton tyrosine kinase inhibitor on efficacy of adjuvanted recombinant hepatitis B and zoster vaccines.                                                                                                  | Same data as in other studies (Interim analysis of Pleyer C, et al. BTK inhibitors impair humoral and |

|    |                        |                                                                                                                                                                                                                                                             |                                                                                           |
|----|------------------------|-------------------------------------------------------------------------------------------------------------------------------------------------------------------------------------------------------------------------------------------------------------|-------------------------------------------------------------------------------------------|
|    |                        |                                                                                                                                                                                                                                                             | cellular responses to re-combinant zoster vaccine in CLL. Blood Adv. 2022;6(6):1732-1740) |
| 26 | Callegaro et al., 2022 | Association Between Immunogenicity and Reactogenicity: A Post Hoc Analysis of 2 Phase 3 Studies with the Adjuvanted Recombinant Zoster Vaccine.                                                                                                             | Same data as in other studies (Post hoc analysis of ZOE data)                             |
| 27 | Koldehoff et al., 2022 | Cellular Immune Response after Vaccination with an Adjuvanted, Recombinant Zoster Vaccine in Allogeneic Hematopoietic Stem Cell Transplant Recipients                                                                                                       | No data on anti-gE response                                                               |
| 28 | Lindemann et al., 2022 | Prospective, Longitudinal Study on Specific Cellular Immune Responses after Vaccination with an Adjuvanted, Recombinant Zoster Vaccine in Kidney Transplant Recipients                                                                                      | No data on anti-gE response                                                               |
| 29 | Galgani et al., 2023   | Immunogenicity and safety of the non-typable Haemophilus influenzae-Moraxella catarrhalis (NTHi-Mcat) vaccine administered following the recombinant zoster vaccine versus administration alone: Results from a randomized, phase 2a, non-inferiority trial | No data on immune response to RZV                                                         |
| 30 | Chen et al., 2023      | Vaccination against Varicella Zoster Virus Infection in Less Developed Regions of Guangdong, China: A Cross-Sectional Serosurveillance Study                                                                                                                | No data on immune response to RZV                                                         |
| 31 | Venerito et al., 2023  | Immunogenicity and Safety of Adjuvanted Recombinant Zoster Vaccine in Rheumatoid Arthritis Patients on Anti-Cellular Biologic Agents or JAK Inhibitors: A Prospective Observational Study                                                                   | No data on anti-gE response                                                               |

---

Abbreviations: RZV, recombinant zoster vaccine.



**Table S4.** Definition of endpoints not accepted for inclusion in the meta-analysis for the vaccine response rate (VRR)

| Author, year                        | Definition not accepted for seroconversion                                                                                                                                                                                                                                                                                                                         |
|-------------------------------------|--------------------------------------------------------------------------------------------------------------------------------------------------------------------------------------------------------------------------------------------------------------------------------------------------------------------------------------------------------------------|
| Laing et al., 2023                  | CMI-specific VRR not reported.                                                                                                                                                                                                                                                                                                                                     |
| Weinberg et al., 2023               | Humoral- and CMI-specific VRR not reported.                                                                                                                                                                                                                                                                                                                        |
| Boutry et al., 2022                 | Humoral- and CMI-specific VRR not reported.                                                                                                                                                                                                                                                                                                                        |
| Johnson et al., 2022                | Not all CD4 <sup>+</sup> T cell activation markers considered.                                                                                                                                                                                                                                                                                                     |
| Muchtar et al., 2022                | Not all CD4 <sup>+</sup> T cell activation markers considered.                                                                                                                                                                                                                                                                                                     |
| Pleyer et al., 2022                 | Type of test for humoral VRR: Luciferase immunoprecipitation assay (LIPS).<br>Time from vaccination to blood sample collection: 3 months.                                                                                                                                                                                                                          |
| Strezova et al., 2022               | Humoral- and CMI-specific VRR not reported.                                                                                                                                                                                                                                                                                                                        |
| Dagnew et al., 2021                 | Humoral- and CMI-specific VRR not reported.                                                                                                                                                                                                                                                                                                                        |
| Hastie et al., 2021                 | Humoral- and CMI-specific VRR not reported.                                                                                                                                                                                                                                                                                                                        |
| Hirzel et al., 2021                 | Time between vaccine doses up to 6 months. Time from vaccination to blood sample collection: 3–6 weeks. Humoral- and CMI-specific VRR not reported.                                                                                                                                                                                                                |
| L'Huillier et al., 2021             | Definitions not accepted for seropositivity: Humoral immunity was expressed as mean (adjusted) in optical density rather than an antibody concentration. CMI-specific VRR not reported.                                                                                                                                                                            |
| Schmid et al., 2021                 | Humoral- and CMI-specific VRR not calculated.                                                                                                                                                                                                                                                                                                                      |
| Zent et al., 2021                   | Time between vaccine doses up to three months.                                                                                                                                                                                                                                                                                                                     |
| Lal et al., 2018                    | Report (b) and (c) not included for time between vaccine doses of 6 and 12 months, respectively                                                                                                                                                                                                                                                                    |
| Schwarz et al., 2018                | Humoral- and CMI-specific VRR not reported.                                                                                                                                                                                                                                                                                                                        |
| Weinberg et al., 2018               | Humoral-specific VRR not analysed. CMI-specific VRR not reported.                                                                                                                                                                                                                                                                                                  |
| Gruppig et al., 2017                | Humoral- and CMI-specific VRR not reported.                                                                                                                                                                                                                                                                                                                        |
| Vink et al., 2017 (cohorts a and b) | Definitions not accepted for seropositivity: Anti-gE titre equal to or the lower detection limit of ELISA of 18 international units/mL                                                                                                                                                                                                                             |
| Chlibek et al., 2016                | Definitions not accepted for seropositivity: Anti-gE titre equal to or above the detection limit of the ELISA of 18 international units/mL. Humoral- and CMI-specific VRR not reported.                                                                                                                                                                            |
| Chlibek et al., 2014                | Definitions not accepted for seropositivity: Anti-gE titre equal to or above the detection limit of the enzyme-linked immunosorbent assay (ELISA) of 18 international units/mL. Humoral- and CMI-specific VRR not reported.                                                                                                                                        |
| Stadtmauer et al., 2014             | Definitions not accepted for seropositivity: Anti-gE titre equal to or above the detection limit of ELISA of 18 international units/mL                                                                                                                                                                                                                             |
| Chlibek et al., 2013                | Definitions not accepted for seropositivity: Anti-gE titre equal to or the lower detection limit of ELISA of 18 international units/mL.<br>Supplementary material with VRR data for both humoral and CMI immunity not retrieved at <a href="https://academic.oup.com/jid/article/208/12/1953/2192556">https://academic.oup.com/jid/article/208/12/1953/2192556</a> |
| Leroux-Roels et al., 2012           | Definitions not accepted for seropositivity: Anti-gE titre equal to or above the detection limit of ELISA of 195 international units/mL.<br>CMI-specific VRR not reported.                                                                                                                                                                                         |

Abbreviations: VRR, vaccine response rate; CMI, cell-mediated immunity; ELISA, enzyme-linked immunosorbent assay.

**Table S5.** Pooled estimates of vaccine response rate for humoral immunity one month after RZV-dose 2 according to selected subgroups

| Subgroup                                                | Reports (N) | Vaccine response rate (95% Confidence Interval) | Heterogeneity | <i>P</i> value for heterogeneity between subgroups |
|---------------------------------------------------------|-------------|-------------------------------------------------|---------------|----------------------------------------------------|
| <b>Overall</b>                                          | 37          | 0.9515 [0.9185; 0.9715]                         | 94.2%         |                                                    |
| <b>Age at vaccination</b>                               |             |                                                 |               | < 0.0001                                           |
| ≥18                                                     | 7           | 0.7987 [0.5880; 0.9169]                         | 91.8%         |                                                    |
| ≥30                                                     | 1           | 0.5100 [0.3533; 0.6648]                         | -             |                                                    |
| ≥40                                                     | 1           | 0.3600 [0.1991; 0.5600]                         | -             |                                                    |
| ≥50                                                     | 18          | 0.9690 [0.9496; 0.9810]                         | 89.2%         |                                                    |
| ≥60                                                     | 5           | 0.9839 [0.9487; 0.9951]                         | 17.1%         |                                                    |
| ≥70                                                     | 5           | 0.9692 [0.9271; 0.9874]                         | 45.3%         |                                                    |
| <b>Immunocompetent adults</b>                           |             |                                                 |               | < 0.0001                                           |
| Yes                                                     | 23          | 0.9779 [0.9731; 0.9819]                         | 0.0%          |                                                    |
| No                                                      | 14          | 0.7760 [0.6466; 0.8677]                         | 87.8%         |                                                    |
| <b>Co-administration with other vaccines</b>            |             |                                                 |               | 0.003                                              |
| No                                                      | 28          | 0.9333 [0.8789; 0.9643]                         | 94.8%         |                                                    |
| Yes                                                     | 9           | 0.9792 [0.9682; 0.9865]                         | 22.8%         |                                                    |
| <b>Dosing interval</b>                                  |             |                                                 |               | < 0.0001                                           |
| One month                                               | 3           | 0.7559 [0.3812; 0.9396]                         | 96.5%         |                                                    |
| One/two months                                          | 3           | 0.7577 [0.6651; 0.8312]                         | 61.4%         |                                                    |
| Two months                                              | 31          | 0.9656 [0.9412; 0.9800]                         | 91.0%         |                                                    |
| <b>Including subjects with history of herpes zoster</b> |             |                                                 |               | 0.01                                               |
| No                                                      | 32          | 0.9623 [0.9360; 0.9780]                         | 94.0%         |                                                    |
| Yes                                                     | 3           | 0.8899 [0.8075; 0.9397]                         | 0.0%          |                                                    |
| <b>Study design</b>                                     |             |                                                 |               | < 0.0001                                           |
| Randomised controlled trial                             | 34          | 0.9589 [0.9330; 0.9750]                         | 93.5%         |                                                    |
| Cohort                                                  | 2           | 0.4495 [0.3311; 0.5739]                         | 25.6%         |                                                    |
| <b>Multi-country</b>                                    |             |                                                 |               | 0.62                                               |
| No                                                      | 13          | 0.9420 [0.8685; 0.9756]                         | 91.9%         |                                                    |
| Yes                                                     | 24          | 0.9558 [0.9149; 0.9775]                         | 95.3%         |                                                    |

Abbreviations: RZV, recombinant zoster vaccine.

**Table S6.** Random-effects meta-regression results of the association between vaccine response rate for humoral immunity (one month after RZV-dose 2) and mediators

| Mediator                                                | Univariable               |         | Multivariable <sup>^</sup> |                  |
|---------------------------------------------------------|---------------------------|---------|----------------------------|------------------|
|                                                         | Coefficient<br>(95% CI)   | P value | Coefficient<br>(95% CI)    | P value          |
| <b>Age at vaccination</b>                               |                           |         |                            |                  |
| ≥18                                                     | Reference                 | -       | Reference                  | -                |
| ≥30                                                     | -1.2910 (-3.5179; 0.9359) | 0.2559  | -1.6734 (-3.3314; -0.0155) | <b>0.0479</b>    |
| ≥40                                                     | -1.9284 (-4.2146; 0.3579) | 0.0983  | -2.2644 (-3.9918; -0.5370) | <b>0.0102</b>    |
| ≥50                                                     | 2.1112 (1.1621; 3.0602)   | <.0001  | -0.1709 (-1.3210; 0.9791)  | 0.7708           |
| ≥60                                                     | 2.7785 (1.3830; 4.1740)   | <.0001  | 0.4258 (-1.0225; 1.8741)   | 0.5645           |
| ≥70                                                     | 2.1959 (0.8292; 3.5627)   | 0.0016  | -0.0648 (-1.5125; 1.3829)  | 0.9301           |
| <b>Sex (increasing proportion of female vaccinees)</b>  | 0.0678 (0.0350; 0.1007)   | <.0001  | 0.0071 (-0.0215; 0.0356)   | 0.6287           |
| <b>Immunocompetent adults</b>                           |                           |         |                            |                  |
| No                                                      | Reference                 | -       | Reference                  | -                |
| Yes                                                     | 2.7464 (2.1465; 3.3463)   | <.0001  | 2.1134 (1.2359; 2.9908)    | <b>&lt;.0001</b> |
| <b>Co-administration with other vaccines</b>            |                           |         |                            |                  |
| No                                                      | Reference                 | -       | Reference                  | -                |
| Yes                                                     | 1.4826 (0.2726; 2.6925)   | 0.0163  | 0.0431 (-0.6640; 0.7502)   | 0.9049           |
| <b>Dosing interval</b>                                  |                           |         |                            |                  |
| One month                                               | Reference                 | -       | Reference                  | -                |
| One/two months                                          | 0.1058 (-2.1588; 2.3704)  | 0.9270  | 0.3312 (-0.9472; 1.6096)   | 0.6116           |
| Two months                                              | 2.1914 (0.5025; 3.8803)   | 0.0110  | 0.7421 (-0.5242; 2.0084)   | 0.2507           |
| <b>Including subjects with history of Herpes Zoster</b> |                           |         |                            |                  |
| No                                                      | Reference                 | -       |                            |                  |
| Yes                                                     | -0.9869 (-2.8183; 0.8446) | 0.2909  |                            |                  |
| <b>Study design</b>                                     |                           |         |                            |                  |
| Cohort                                                  | Reference                 | -       |                            |                  |
| Randomised controlled trial                             | 3.4150 (1.3578; 5.4722)   | 0.0011  |                            |                  |
| <b>Multi-country</b>                                    |                           |         |                            |                  |
| Yes                                                     | Reference                 | -       |                            |                  |
| No (United States)                                      | -0.2687 (-1.4268; 0.8894) | 0.6493  |                            |                  |

<sup>^</sup> Redundant predictors dropped from the multivariable model.

Abbreviations: RZV, recombinant zoster vaccine; 95%CI, 95% confidence interval.

**Table S7.** Pooled estimates of vaccine response rate for cell-mediated immunity one month after RZV-dose 2 according to selected subgroups

| Subgroup                                                | Reports (N) | Vaccine response rate (95% Confidence Interval) | Heterogeneity | <i>P</i> value for heterogeneity between subgroups |
|---------------------------------------------------------|-------------|-------------------------------------------------|---------------|----------------------------------------------------|
| <b>Overall</b>                                          | 10          | 0.8459 [0.7520; 0.9086]                         | 71.9%         |                                                    |
| <b>Age at vaccination</b>                               |             |                                                 |               | 0.20                                               |
| ≥18                                                     | 6           | 0.8352 [0.6702; 0.9267]                         | 70.7%         |                                                    |
| ≥40                                                     | 1           | 0.7500 [0.5436; 0.8831]                         | -             |                                                    |
| ≥50                                                     | 3           | 0.9040 [0.7992; 0.9571]                         | 59.4%         |                                                    |
| <b>Immunocompetent adults</b>                           |             |                                                 |               | 0.02                                               |
| No                                                      | 9           | 0.8252 [0.7216; 0.8958]                         | 58.2%         |                                                    |
| Yes                                                     | 1           | 0.9330 [0.8799; 0.9636]                         | -             |                                                    |
| <b>Co-administration with other vaccines</b>            |             |                                                 |               | Not estimable                                      |
| No                                                      | 10          | 0.8459 [0.7520; 0.9086]                         | 71.9%         |                                                    |
| Yes                                                     | 0           | -                                               | -             |                                                    |
| <b>Dosing interval</b>                                  |             |                                                 |               | 0.13                                               |
| One month                                               | 2           | 0.7014 [0.4247; 0.8820]                         | 86.9%         |                                                    |
| One/two months                                          | 3           | 0.8251 [0.6358; 0.9273]                         | 65.4%         |                                                    |
| Two months                                              | 5           | 0.8957 [0.8252; 0.9398]                         | 47.4%         |                                                    |
| <b>Including subjects with history of herpes zoster</b> |             |                                                 |               |                                                    |
| No                                                      | 10          | 0.8459 [0.7520; 0.9086]                         | 71.9%         |                                                    |
| Yes                                                     | 0           | -                                               | -             |                                                    |
| <b>Study design</b>                                     |             |                                                 |               | Not estimable                                      |
| Randomised controlled trial                             | 10          | 0.8459 [0.7520; 0.9086]                         | 71.9%         |                                                    |
| Cohort                                                  | 0           | -                                               | -             |                                                    |
| <b>Multi-country</b>                                    |             |                                                 |               | 0.24                                               |
| No                                                      | 1           | 0.7500 [0.5436; 0.8831]                         | -             |                                                    |
| Yes                                                     | 9           | 0.8550 [0.7536; 0.9192]                         | 74.0%         |                                                    |

Abbreviations: RZV, recombinant zoster vaccine.

**Table S8.** Random-effects meta-regression results of the association between vaccine response rate for cell-mediated immunity (one month after RZV-dose 2) and mediators

| Mediator                                               | Univariable               |               | Multivariable           |         |
|--------------------------------------------------------|---------------------------|---------------|-------------------------|---------|
|                                                        | Coefficient<br>(95% CI)   | P value       | Coefficient<br>(95% CI) | P value |
| <b>Age at vaccination</b>                              |                           |               |                         |         |
| ≥18                                                    | Reference                 | -             |                         |         |
| ≥40                                                    | -0.4319 (-2.2124; 1.3487) | 0.6345        |                         |         |
| ≥50                                                    | 0.5547 (-0.6575; 1.7669)  | 0.3698        |                         |         |
| <b>Sex (increasing proportion of female vaccinees)</b> | -0.0045 (-0.0431; 0.0341) | 0.8186        |                         |         |
| <b>Immunocompetent adults</b>                          |                           |               |                         |         |
| No                                                     | Reference                 | -             |                         |         |
| Yes                                                    | 1.1322 (0.3617; 2.6261)   | 0.1374        |                         |         |
| <b>Dosing interval</b>                                 |                           |               |                         |         |
| One month                                              | Reference                 | -             |                         |         |
| One/two months                                         | 0.6969 (-0.6680; 2.0619)  | 0.3170        |                         |         |
| Two months                                             | 1.3005 (0.0882; 2.5127)   | <b>0.0355</b> |                         |         |
| <b>Multi-country</b>                                   |                           |               |                         |         |
| Yes                                                    | Reference                 | -             |                         |         |
| No (United States)                                     | -0.6288 (-2.4952; 1.2377) | 0.5091        |                         |         |

Abbreviations: RZV, recombinant zoster vaccine; 95%CI, 95% confidence interval.

**Table S9.** Risk of bias (RoB) of randomized controlled trials

| Study, year of publication | Domain 1      | Domain 2 | Domain 3 | Domain 4 | Domain 5 | Overall RoB          |
|----------------------------|---------------|----------|----------|----------|----------|----------------------|
| Laing, 2023                | Low           | Low      | Low      | Low      | Low      | <b>Low</b>           |
| Naficy, 2023               | Low           | Low      | Low      | Low      | Low      | <b>Low</b>           |
| Weinberg, 2023             | Low           | Low      | Low      | Low      | Low      | <b>Low</b>           |
| Boutry, 2022               | Low           | Low      | Low      | Low      | Low      | <b>Low</b>           |
| Johnson, 2022              | Low           | Low      | Low      | Low      | Low      | <b>Low</b>           |
| Min, 2022                  | Some concerns | Low      | Low      | Low      | Low      | <b>Some Concerns</b> |
| Pleyer, 2022               | Low           | Low      | Low      | Low      | Low      | <b>Low</b>           |
| Strezova, 2022             | High          | Low      | Low      | Low      | Low      | <b>High</b>          |
| Dagnew, 2021               | Low           | Low      | Low      | Low      | Low      | <b>Low</b>           |
| Hastie, 2021               | High          | Low      | Low      | Low      | Low      | <b>High</b>          |
| Schmid, 2021               | Low           | Low      | Low      | Low      | Low      | <b>Low</b>           |
| Stadtmauer, 2021           | Low           | Low      | Low      | Low      | Low      | <b>Low</b>           |
| Vink, 2020                 | Low           | Low      | Low      | Low      | Low      | <b>Low</b>           |
| Bastidas, 2019             | Low           | Low      | Low      | Low      | Low      | <b>Low</b>           |
| Dagnew, 2019               | Low           | Low      | High     | Low      | Low      | <b>High</b>          |
| Marechal, 2019             | Low           | Low      | Low      | Low      | Low      | <b>Low</b>           |
| Strezova, 2019             | Low           | Low      | Low      | Low      | Low      | <b>Low</b>           |
| Vink, 2019                 | Low           | Low      | Low      | Low      | Low      | <b>Low</b>           |
| Cunningham, 2018           | Low           | Low      | Low      | Low      | Low      | <b>Low</b>           |
| Lal, 2018                  | Low           | Low      | Low      | Low      | Low      | <b>Low</b>           |
| Schwarz, 2018              | Low           | Low      | Low      | Low      | Low      | <b>Low</b>           |
| Weinberg, 2018             | Low           | Low      | Low      | Low      | Low      | <b>Low</b>           |
| Godeaux, 2017              | High          | Low      | Low      | Low      | Low      | <b>High</b>          |
| Gruppung, 2017             | High          | Low      | Low      | Low      | Low      | <b>High</b>          |
| Schwarz, 2017              | Low           | Low      | Low      | Low      | Low      | <b>Low</b>           |

| Study, year of publication | Domain 1      | Domain 2 | Domain 3 | Domain 4 | Domain 5 | Overall RoB   |
|----------------------------|---------------|----------|----------|----------|----------|---------------|
| Strezova, 2017             | Low           | Low      | Low      | Low      | Low      | Low           |
| Vink, 2017                 | Some Concerns | Low      | Low      | Low      | Low      | Some Concerns |
| Chlibek, 2016              | Low           | Low      | Low      | Low      | Low      | Low           |
| Berkowitz, 2015            | Low           | Low      | Low      | Low      | Low      | Low           |
| Chlibek, 2014              | Low           | Low      | Low      | Low      | Low      | Low           |
| Stadtmauer, 2014           | Low           | Low      | Low      | Low      | Low      | Low           |
| Chlibek, 2013              | Low           | Low      | Low      | Low      | Low      | Low           |
| Leroux-Roels, 2012         | Low           | Low      | Low      | Low      | Low      | Low           |

RoB items included: domain 1 (randomization), domain. 2 (deviation from intended intervention), domain 3 (outcome missingness), domain 4 (outcome measurement), domain 5 (selective reporting).

Each domain was graded through a set of response options – from “Low” to “Some Concerns” to “High”, or Not/Applicable (NA).

RoB of randomised controlled trials has been evaluated using the Cochrane risk of bias tool (see: Sterne JAC, Savović J, Page MJ et al. RoB 2: a revised tool for assessing risk of bias in randomised trials. BMJ. 2019;366:14898).

3  
4  
5  
6  
7  
8  
9

**Table S10.** Risk of bias (RoB) of non-randomized studies (cohort studies)

| Study, year of publication | Domain 1 | Domain 2 | Domain 3 | Domain 4 | Domain 5 | Domain 6 | Domain 7 | Domain 8 | Domain 9 | Overall<br>RoB |
|----------------------------|----------|----------|----------|----------|----------|----------|----------|----------|----------|----------------|
| Muchtar, 2022              | Yes      | Yes      | No       | Yes      | Yes      | Yes      | Yes      | Yes      | Yes      | <b>Low</b>     |
| Hirzel, 2021               | Yes      | Yes      | Yes      | No       | Yes      | Yes      | Yes      | Yes      | Yes      | <b>High</b>    |
| L’Huillier, 2021           | Yes      | Yes      | Yes      | No       | Yes      | Yes      | Yes      | Yes      | Yes      | <b>High</b>    |
| Zent, 2021                 | Yes      | <b>Low</b>     |

RoB items included: domain 1 (clarity of ‘cause’ and ‘effect’), domain 2 (comparison similarities), domain 3 (comparisons of similar treatments), domain 4 (control group), domain 5 (multiple measurements pre and post), domain 6 (follow up), domain 7 (similarity of outcome measures), domain 8 (measurement reliability), domain 9 (appropriate statistical analysis).

Each domain was graded through a set of response options: “Yes”, “No”, “Unclear” or Not/Applicable (NA).

RoB of non-randomised studies was evaluated using the Joanna Briggs Institute checklist for cohort studies (see: Moola S, Munn Z, Tufanaru C, et al. Chapter 7: Systematic reviews of etiology and risk. In: Aromataris E, Munn Z (Editors). JBI Manual for Evidence Synthesis. JBI, 2020. Available from <https://synthesismanual.jbi.global>).



**Table S11.** Egger’s regression asymmetry test for random-effects meta-analyses

| Model                                       | Intercept (95%CI)   | t      | P value |
|---------------------------------------------|---------------------|--------|---------|
| Humoral VRR one month after RZV-dose 2      | 2.82 (-0.13; 5.76)  | 1.874  | 0.07    |
| CMI-specific VRR one month after RZV-dose 2 | -0.21 (-4.51; 4.09) | -0.096 | 0.93    |

Abbreviations: RZV, recombinant zoster vaccine; VRR, vaccine response rate; CMI, cell-mediated immunity; 95%CI, 95% confidence interval.

## Supplementary S3

### Supplementary figures

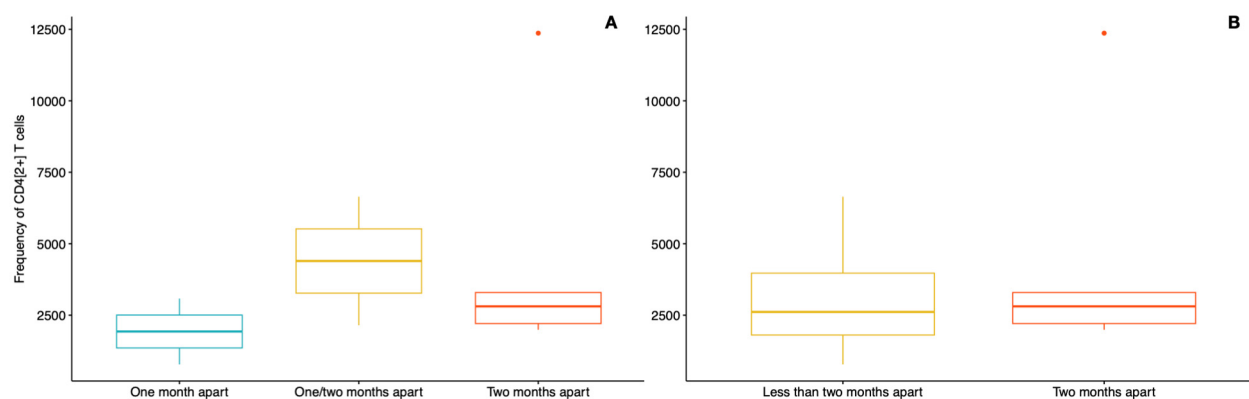

**Figure S1.** Median CD4<sup>2+</sup> T-cell frequencies by time between the two doses of recombinant zoster vaccine (RZV). Median CD4<sup>2+</sup> T-cell frequencies are sourced from reports included in the meta-analysis of vaccine response rates of cell-mediated immunity. Panel A presents the results based on dosing interval as included in the meta-analysis; Panel B includes a sensitivity analysis by combining all studies that administered doses within two months. Kruskal Wallis test was used to determine whether the medians of the groups were unequal.

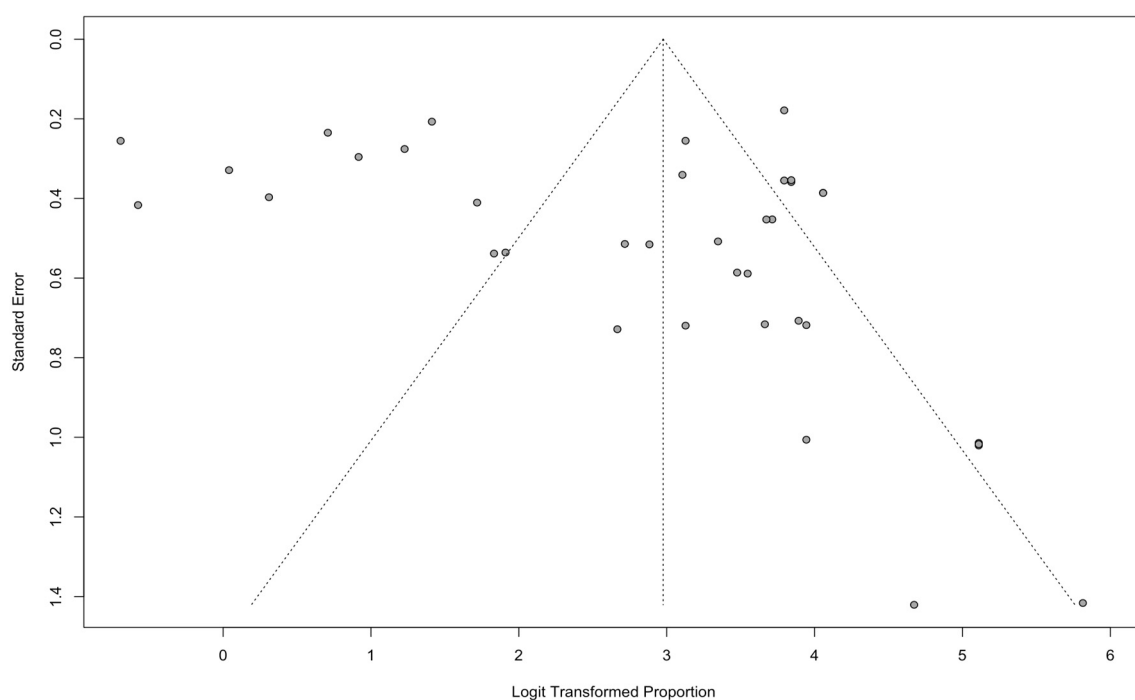

**Figure S2.** Funnel plot of random-effects meta-analysis of humoral VRR one month after RZV dose 2  
Abbreviations: VRR, vaccine response rate; RZV, recombinant zoster vaccine.

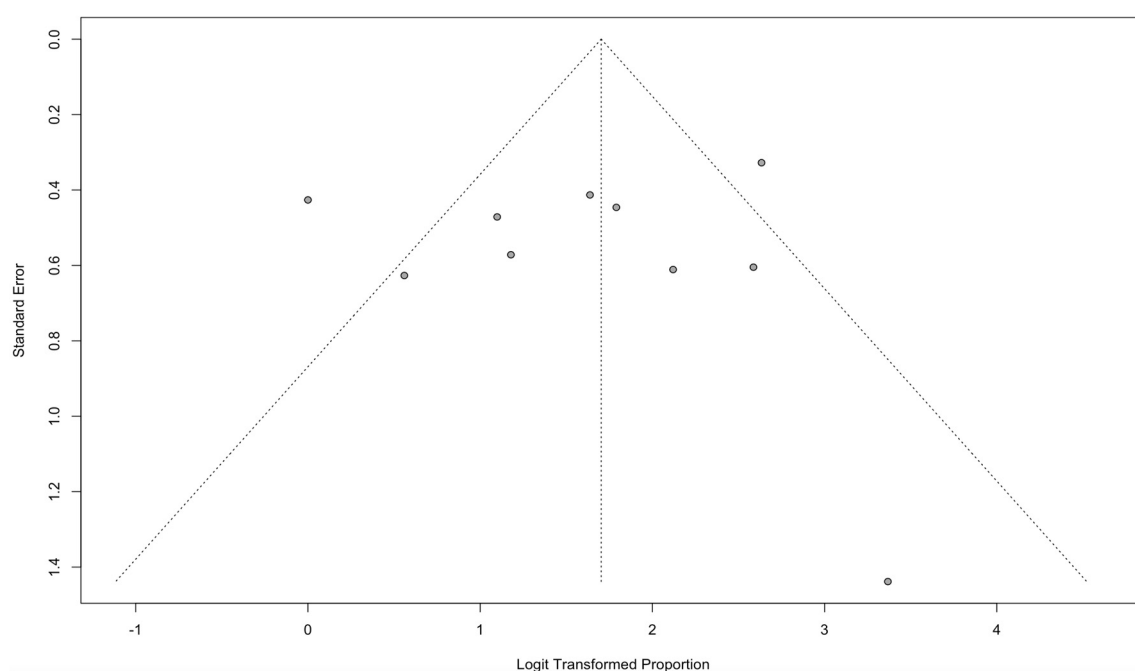

**Figure S3.** Funnel plot of random-effects meta-analysis of CMI-specific VRR one month after RZV dose 2  
Abbreviations: VRR, vaccine response rate; RZV, recombinant zoster vaccine; CMI, cell-mediated immunity.

**Disclaimer/Publisher's Note:** The statements, opinions and data contained in all publications are solely those of the individual author(s) and contributor(s) and not of MDPI and/or the editor(s). MDPI and/or the editor(s) disclaim responsibility for any injury to people or property resulting from any ideas, methods, instructions or products referred to in the content.
